# Supplementary material for: Structural Organization of Dibromodiazadienes in the Crystal and Identification of Br···O Halogen Bonding Involving the Nitro Group
Source: MDPI journal article supplement (doi:10.3390/molecules27165110), 2022-08-11
Supplement: s1 [file s1]

### Crystal structure determinations

The single-crystal X-ray diffraction data for **1**, **6a**, **8** and **10a** were collected on a three-circle Bruker D8 QUEST PHOTON-III CCD diffractometer ( $T = 100$  K,  $\lambda(\text{MoK}\alpha) = 0.71073$  Å, graphite monochromator,  $\omega$  and  $\varphi$  scanning mode). The data were indexed and integrated using the *SAINT* program [S1], and then scaled and corrected for absorption using the *SADABS* program [S2]. The single-crystal X-ray diffraction data for **13** and **15** were collected at the 'RSA' beamline ( $T = 100$  K,  $\lambda = 0.79475$  Å) of the Kurchatov Synchrotron Radiation Source. In total, 720 frames were collected with an oscillation range of  $1.0^\circ$  in the  $\varphi$  scanning mode using two different orientations for each crystal. The semi-empirical correction for absorption was applied using the *Scala* program [S3]. The data were indexed and integrated using the utility *iMOSFLM* from the CCP4 software suite [S4, S5]. For details, see **Table S1**.

The structures were solved by intrinsic phasing modification of direct methods [S6] and refined by a full-matrix least-squares technique on  $F^2$  with anisotropic displacement parameters for all non-hydrogen atoms. The hydrogen atoms were placed in calculated positions and refined within the riding model with fixed isotropic displacement parameters [ $U_{\text{iso}}(\text{H}) = 1.5U_{\text{eq}}(\text{C})$  for the methyl groups and  $1.2U_{\text{eq}}(\text{C})$  for the other groups]. All calculations were carried out using the *SHELXTL* program [S7, S8].

Crystallographic data for **1**, **6a**, **8**, **10a**, **13** and **15** have been deposited with the Cambridge Crystallographic Data Center, CCDC 2189773 (**1**), CCDC 2189774 (**6a**), CCDC 2189348 (**8**), CCDC 2189775 (**10a**), CCDC 2189776 (**13**), CCDC 2189777 (**15**). Copies of this information may be obtained free of charge from the Director, CCDC, 12 Union Road, Cambridge CB2 1EZ, UK (fax: +44 1223 336033; e-mail: [deposit@ccdc.cam.ac.uk](mailto:deposit@ccdc.cam.ac.uk) or [www.ccdc.cam.ac.uk](http://www.ccdc.cam.ac.uk)).

### References

- [S1] Bruker, *SAINT*, V8.37A, Bruker AXS Inc., Madison, WI, **2018**.
- [S2] L. Krause, R. Herbst-Irmer, G.M. Sheldrick, D. Stalke, *J. Appl. Cryst.* **2015**, *48*, 3-10.
- [S3] Evans, P. *Acta Crystallogr.* **2006**, *D62*, 72-82.
- [S4] Battye, T.G.G.; Kontogiannis, L.; Johnson, O.; Powell, H.R.; Leslie, A.G.W. *Acta Crystallogr.* **2011**, *D67*, 271-281.
- [S5] Winn, M.D.; Ballard, C.C.; Cowtan, K.D.; Dodson, E.J.; Emsley, P.; Evans, P.R.; Keegan, R.M.; Krissinel, E.B.; Leslie, A.G.W.; McCoy, A.; McNicholas, S.J.; Murshudov, G.N.; Pannu, N.S.; Potterton, E.A.; Powell, H.R.; Read, R.J.; Vagin, A.; Wilson, K.S. *Acta Crystallogr.* **2011**, *D67*, 235-242.
- [S6] Sheldrick, G.M. *Acta Crystallogr.* **2015**, *A71*, 3-8.
- [S7] Sheldrick, G.M. *Acta Crystallogr.* **2008**, *A64*, 112-122.
- [S8] Sheldrick, G.M. *Acta Crystallogr.* **2015**, *C71*, 3-8.

**Table S1.** Crystal data and structure refinement for **1**, **6a**, **8**, **10a**, **13** and **15**.

| Identification code                                                                     | <b>1</b>                                                                     | <b>6a</b>                                                       | <b>8</b>                                                                     | <b>10a</b>                                                      | <b>13</b>                                                                      | <b>15</b>                                                                     |
|-----------------------------------------------------------------------------------------|------------------------------------------------------------------------------|-----------------------------------------------------------------|------------------------------------------------------------------------------|-----------------------------------------------------------------|--------------------------------------------------------------------------------|-------------------------------------------------------------------------------|
| Empirical formula                                                                       | C <sub>14</sub> H <sub>9</sub> N <sub>3</sub> O <sub>2</sub> Br <sub>2</sub> | C <sub>8</sub> H <sub>5</sub> NO <sub>2</sub> Br <sub>2</sub>   | C <sub>14</sub> H <sub>8</sub> N <sub>3</sub> O <sub>2</sub> Br <sub>3</sub> | C <sub>8</sub> H <sub>5</sub> NO <sub>2</sub> Br <sub>2</sub>   | C <sub>14</sub> H <sub>8</sub> N <sub>3</sub> O <sub>2</sub> ClBr <sub>2</sub> | C <sub>15</sub> H <sub>11</sub> N <sub>3</sub> O <sub>2</sub> Br <sub>2</sub> |
| Formula weight                                                                          | 411.06                                                                       | 306.95                                                          | 489.96                                                                       | 306.95                                                          | 445.48                                                                         | 425.07                                                                        |
| Crystal size, mm <sup>3</sup>                                                           | 0.17 × 0.21 × 0.35                                                           | 0.10 × 0.13 × 0.53                                              | 0.05 × 0.06 × 0.34                                                           | 0.09 × 0.33 × 0.59                                              | 0.10 × 0.10 × 0.20                                                             | 0.10 × 0.12 × 0.15                                                            |
| Crystal system                                                                          | Orthorhombic                                                                 | Monoclinic                                                      | Orthorhombic                                                                 | Monoclinic                                                      | Orthorhombic                                                                   | Orthorhombic                                                                  |
| Space group                                                                             | <i>Pbcn</i>                                                                  | <i>P2<sub>1</sub>/c</i>                                         | <i>Pbca</i>                                                                  | <i>Pn</i>                                                       | <i>Pna2<sub>1</sub></i>                                                        | <i>Pna2<sub>1</sub></i>                                                       |
| <i>a</i> , Å                                                                            | 14.9390(3)                                                                   | 3.92910(10)                                                     | 6.6579(1)                                                                    | 3.8523(1)                                                       | 13.853(3)                                                                      | 13.843(3)                                                                     |
| <i>b</i> , Å                                                                            | 15.0262(3)                                                                   | 16.1045(6)                                                      | 15.7683(3)                                                                   | 7.1425(2)                                                       | 13.474(3)                                                                      | 13.558(3)                                                                     |
| <i>c</i> , Å                                                                            | 13.1009(2)                                                                   | 14.4329(5)                                                      | 29.0301(6)                                                                   | 16.4527(4)                                                      | 8.2790(6)                                                                      | 8.2810(17)                                                                    |
| $\alpha$ , deg.                                                                         | 90                                                                           | 90                                                              | 90                                                                           | 90                                                              | 90                                                                             | 90                                                                            |
| $\beta$ , deg.                                                                          | 90                                                                           | 96.1786(11)                                                     | 90                                                                           | 96.5953(7)                                                      | 90                                                                             | 90                                                                            |
| $\gamma$ , deg.                                                                         | 90                                                                           | 90                                                              | 90                                                                           | 90                                                              | 90                                                                             | 90                                                                            |
| <i>V</i> , Å <sup>3</sup>                                                               | 2940.84(9)                                                                   | 907.95(5)                                                       | 3047.69(10)                                                                  | 449.70(2)                                                       | 1545.3(5)                                                                      | 1554.2(6)                                                                     |
| <i>Z</i>                                                                                | 8                                                                            | 4                                                               | 8                                                                            | 2                                                               | 4                                                                              | 4                                                                             |
| Density (calc.), g/cm <sup>3</sup>                                                      | 1.857                                                                        | 2.245                                                           | 2.136                                                                        | 2.267                                                           | 1.915                                                                          | 1.817                                                                         |
| Absorption coefficient, mm <sup>-1</sup>                                                | 5.520                                                                        | 8.890                                                           | 7.951                                                                        | 8.975                                                           | 7.151                                                                          | 6.876                                                                         |
| <i>F</i> (000)                                                                          | 1600                                                                         | 584                                                             | 1872                                                                         | 292                                                             | 864                                                                            | 832                                                                           |
| $\theta$ range, deg.                                                                    | 2.47–34.37                                                                   | 2.53–33.16                                                      | 2.58–32.58                                                                   | 2.49–35.64                                                      | 2.36–30.97                                                                     | 2.35–30.98                                                                    |
| Index ranges                                                                            | -23 ≤ <i>h</i> ≤ 23<br>-23 ≤ <i>k</i> ≤ 23<br>-20 ≤ <i>l</i> ≤ 20            | -6 ≤ <i>h</i> ≤ 6<br>-24 ≤ <i>k</i> ≤ 24<br>-22 ≤ <i>l</i> ≤ 22 | -10 ≤ <i>h</i> ≤ 10<br>-23 ≤ <i>k</i> ≤ 23<br>-43 ≤ <i>l</i> ≤ 43            | -6 ≤ <i>h</i> ≤ 6<br>-11 ≤ <i>k</i> ≤ 11<br>-26 ≤ <i>l</i> ≤ 26 | -17 ≤ <i>h</i> ≤ 17<br>-17 ≤ <i>k</i> ≤ 17<br>-10 ≤ <i>l</i> ≤ 9               | -17 ≤ <i>h</i> ≤ 17<br>-17 ≤ <i>k</i> ≤ 17<br>-10 ≤ <i>l</i> ≤ 10             |
| Reflections collected                                                                   | 95218                                                                        | 7559                                                            | 67179                                                                        | 30661                                                           | 18617                                                                          | 19560                                                                         |
| Independent reflections, <i>R</i> <sub>int</sub>                                        | 6171, 0.041                                                                  | 3449, 0.028                                                     | 5538, 0.033                                                                  | 4167, 0.036                                                     | 3309, 0.065                                                                    | 3523, 0.046                                                                   |
| Reflections observed ( <i>I</i> > 2σ( <i>I</i> ))                                       | 5247                                                                         | 3094                                                            | 4620                                                                         | 4101                                                            | 3192                                                                           | 3223                                                                          |
| Final <i>R</i> <sub>1</sub> / <i>wR</i> <sub>2</sub> indices, <i>I</i> > 2σ( <i>I</i> ) | 0.024 / 0.062                                                                | 0.032 / 0.071                                                   | 0.024 / 0.060                                                                | 0.026 / 0.065                                                   | 0.036 / 0.088                                                                  | 0.042 / 0.106                                                                 |
| Final <i>R</i> <sub>1</sub> / <i>wR</i> <sub>2</sub> indices (all data)                 | 0.033 / 0.066                                                                | 0.043 / 0.076                                                   | 0.034 / 0.064                                                                | 0.026 / 0.066                                                   | 0.037 / 0.089                                                                  | 0.046 / 0.109                                                                 |
| Goodness-of-fit on <i>F</i> <sup>2</sup>                                                | 1.051                                                                        | 1.050                                                           | 1.047                                                                        | 1.050                                                           | 1.031                                                                          | 1.037                                                                         |
| <i>T</i> <sub>min</sub> , <i>T</i> <sub>max</sub>                                       | 0.043, 0.092                                                                 | 0.028, 0.104                                                    | 0.019, 0.058                                                                 | 0.010, 0.059                                                    | 0.280, 0.480                                                                   | 0.370, 0.490                                                                  |
| Extinction coefficient                                                                  | —                                                                            | —                                                               | —                                                                            | —                                                               | 0.0089(9)                                                                      | 0.0036(3)                                                                     |
| $\Delta\rho_{\max}$ / $\Delta\rho_{\min}$ , e <sup>-</sup> Å <sup>-3</sup>              | 0.696 / -0.693                                                               | 0.460 / -0.569                                                  | 0.675 / -0.518                                                               | 0.478 / -0.639                                                  | 0.545 / -0.778                                                                 | 1.509 / -0.845                                                                |

**Table S2.** Known X-ray structures featuring intermolecular interactions Br $\cdots$ NO $_2$  from the Cambridge Structural Database (CSD).

| CSD Refcode | Length of Br $\cdots$ NO $_2$ contacts | Reference                                                                                                                                                                     |
|-------------|----------------------------------------|-------------------------------------------------------------------------------------------------------------------------------------------------------------------------------|
| AJAREI      | Br $\cdots$ O: 2.658 and 2.779 Å       | M. Yoshizawa, M. Nagao, K. Umemoto, K. Biradha, M. Fujita, S. Sakamoto, K. Yamaguchi (2003) Chem. Commun., 1808.                                                              |
| DAFVEO      | Br $\cdots$ O: 3.152 and 3.177 Å       | A. A. Tehrani, S. Abedi, A. Morsali (2017) Cryst. Growth Des., 17, 255.                                                                                                       |
| DARXEC      | Br $\cdots$ O: 3.122 Å                 | S. Maiti, T. K. Achar, P. Mal (2017) Org. Lett., 19, 2006.                                                                                                                    |
| MIFKOE      | Br $\cdots$ O: 3.116 and 3.218 Å       | D. E. Williams, C. R. Martin, E. A. Dolgoplova, A. Swifton, D. C. Godfrey, O. A. Ejegbavwo, P. J. Pellechia, M. D. Smith, N. B. Shustova (2018) J. Am. Chem. Soc., 140, 7611. |
| MIFROJ      | Br $\cdots$ N: 3.377 Å                 | Yu. M. Chumakov, V. I. Tsapkov, G. Bocelli, M. Neuburger, A. P. Gulya (2006) Koord. Khim., 32, 775.                                                                           |
| MIQHUR      | Br $\cdots$ O: 3.253 Å                 | J. Jiang, P. Vairaprakash, K. R. Reddy, T. Sahin, M. Phani Pavan, E. Lubian, J. S. Lindsey (2014) Org. Biomol. Chem., 12, 86.                                                 |
| NOJTIS      | Br $\cdots$ O: 3.030 and 3.071 Å       | R. Puttreddy, A. Peuronen, M. Lahtinen, K. Rissanen (2019) Cryst. Growth Des., 19, 3815.                                                                                      |
| RURTIJ      | Br $\cdots$ N: 3.317 Å                 | R. Raja, S. Kandhasamy, P. T. Perumal, A. Subbiah Pandi (2015) Acta Crystallogr., Sect. E: Cryst. Commun., 71, o648.                                                          |

|        |                                        |                                                                                                                                  |
|--------|----------------------------------------|----------------------------------------------------------------------------------------------------------------------------------|
| SOYGIX | Br...O: 3.348 Å and Br...N:<br>3.294 Å | A. Salhin, N. Abdul Razak, I. A. Rahman (2009) Acta Crystallogr., Sect. E: Struct. Rep. Online, 65, o1221.                       |
| WAKNON | Br...O: 3.299, 3.015, and 3.084 Å      | A. de Bettencourt-Dias, P. S. Barber, S. Viswanathan, D.T. de Lill, A. Rollett, G. Ling, S. Altun (2010) Inorg. Chem., 49, 8848. |
